# Supplementary material for: Chemical bonding and dynamic fluxionality of a B15+cluster: a nanoscale double-axle tank tread
Source: Royal Society of Chemistry journal article supplement (doi:10.1039/c6cp02544g), 2016-01-01
Supplement: c6cp02544g1.pdf [file c6cp02544g1.pdf]

## SUPPLEMENTARY INFORMATION

### Chemical bonding and dynamic fluxionality of $B_{15}^+$ cluster: a nanoscale double-axle tank tread†

Ying-Jin Wang,<sup>ab</sup> Xue-Rui You,<sup>a</sup> Qiang Chen,<sup>ab</sup> Lin-Yan Feng,<sup>a</sup> Kang Wang,<sup>a</sup> Ting Ou,<sup>a</sup>  
Xiao-Yun Zhao,<sup>a</sup> Hua-Jin Zhai<sup>\*ac</sup> and Si-Dian Li<sup>\*a</sup>

<sup>a</sup> Nanocluster Laboratory, Institute of Molecular Science, Shanxi University, Taiyuan 030006, China

<sup>b</sup> Department of Chemistry, Xinzhou Teachers University, Xinzhou 034000, China

<sup>c</sup> State Key Laboratory of Quantum Optics and Quantum Optics Devices,  
Shanxi University, Taiyuan 030006, China

\*E-mail: hj.zhai@sxu.edu.cn (H.J.Z.); lisidian@sxu.edu.cn (S.D.L.)

## SUPPLEMENTARY INFORMATION – PART I

**Table S1.** Cartesian coordinates for the global-minimum structure of  $B_{15}^+ C_{2v} (^1A_1)$  and its corresponding  $C_{2v}$  transition state at the PBE0/6-311+G\* level.

**Figure S1.** Canonical molecular orbitals (CMOs) for the subset of eleven peripheral  $\sigma$  bonds in the  $C_{2v} (^1A_1)$  global minimum of  $B_{15}^+$  cluster. These CMOs are readily localized as two-center two-electron (2c-2e)  $\sigma$  bonds.

**Figure S2.** Canonical molecular orbitals (CMOs) of the  $C_{2v} (^1A_1)$  transition state of  $B_{15}^+$  cluster. (a) Eleven peripheral  $\sigma$  bonds, which can be localized as 2c-2e bonds. (b) Five delocalized  $\sigma$  bonds. (c) Two delocalized  $\sigma$  bonds associated with the inner rhombic  $B_4$  core. (d) Four delocalized  $\pi$  bonds. The CMOs for the (a), (b), and (d) subsets show one-to-one correspondence to each other, from bottom up.

- Figure S3.** Chemical bonding in the  $C_{2v}$  transition state of  $B_{15}^+$ . (a) The electron localization functions (ELFs). (b) Bonding elements as revealed from the adaptive natural density partitioning (AdNDP) analysis. The occupation numbers (ONs) are shown.
- Figure S4.** Optimized structure of the  $C_{2v}$  global minimum of  $B_{14}^-$  cluster at the PBE0/6-311+G\* level.
- Figure S5.** Evolution of electron localization function,  $ELF_{\sigma}$ , against the bifurcation value for the  $C_{2v}$  global minimum of  $B_{15}^+$  cluster. Note that for the rhombic B1B2B12B11 unit, the  $ELF_{\sigma}$  data is consistent with one four-center island only, rather than two three-center islands (B1B2B12 and B11B1B12), supporting the AdNDP scheme presented in Fig. 5(b).

## SUPPLEMENTARY INFORMATION – PART II

**A short movie** extracted from the BOMD simulation for  $B_{15}^+$ . Each frame of the snapshot is reoriented horizontally. The simulation is performed at 500 K for over 60 ps and the movie roughly covers a time span of 30 ps.

**Figure S1.** Canonical molecular orbitals (CMOs) for the subset of eleven peripheral  $\sigma$  bonds in the  $C_{2v}$  ( $^1A_1$ ) global minimum of  $B_{15}^+$  cluster. These CMOs are readily localized as two-center two-electron (2c-2e)  $\sigma$  bonds.

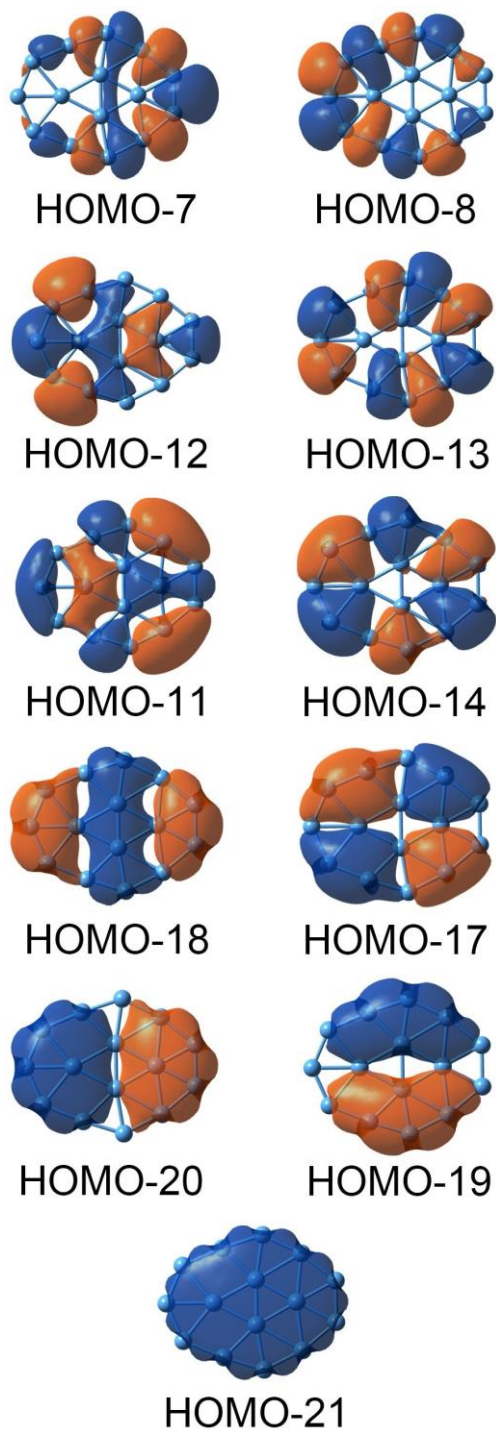

**Figure S2.** Canonical molecular orbitals (CMOs) of the  $C_{2v}$  ( $^1A_1$ ) transition state of  $B_{15}^+$  cluster. (a) Eleven peripheral  $\sigma$  bonds, which can be localized as 2c-2e bonds. (b) Five delocalized  $\sigma$  bonds. (c) Two delocalized  $\sigma$  bonds associated with the inner rhombic  $B_4$  core. (d) Four delocalized  $\pi$  bonds. The CMOs for the (a), (b), and (d) subsets show one-to-one correspondence to each other, from bottom up.

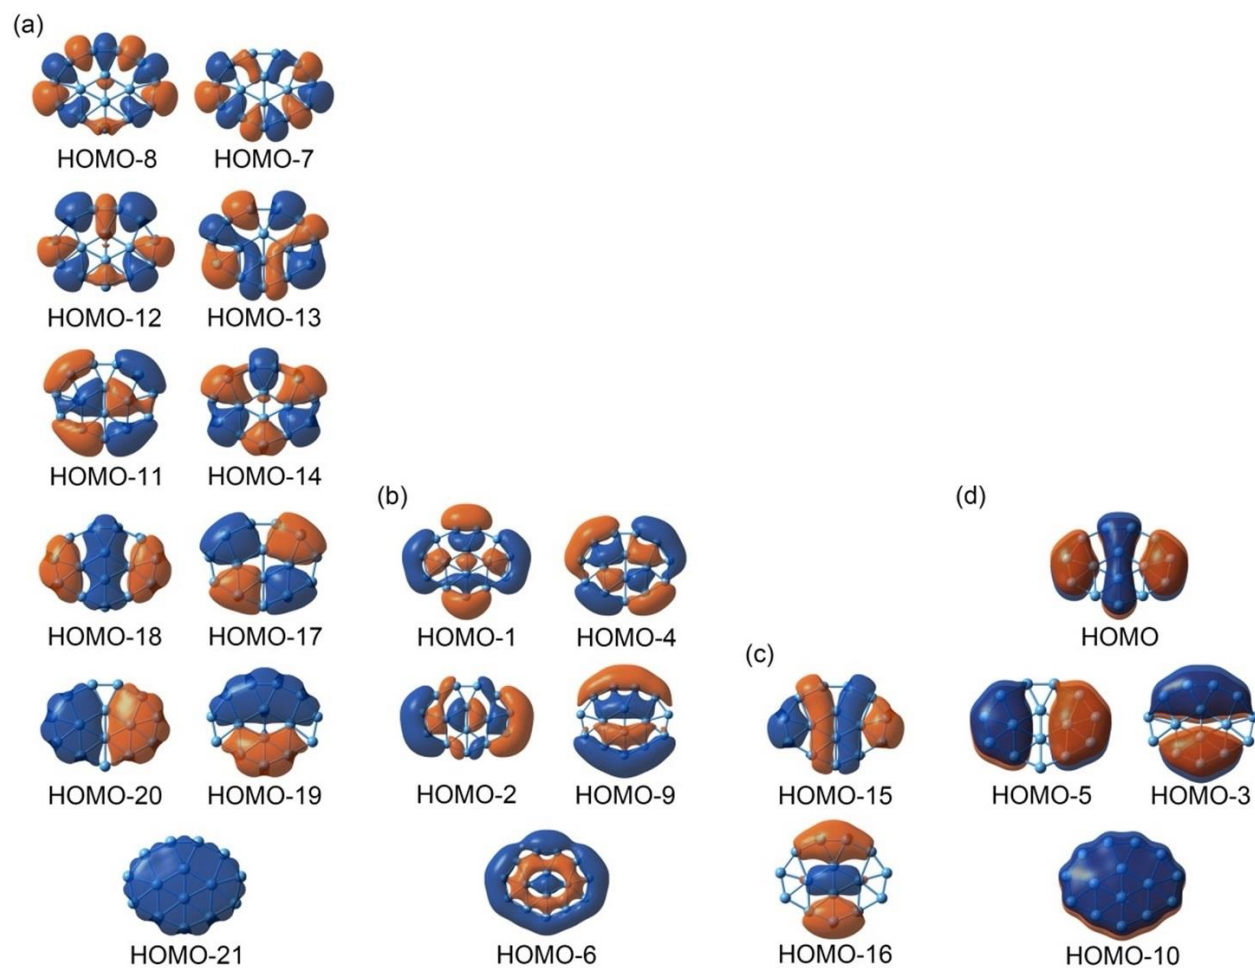

**Figure S3.** Chemical bonding in the  $C_{2v}$  transition state of  $B_{15}^+$ . (a) The electron localization functions (ELFs). (b) Bonding elements as revealed from the adaptive natural density partitioning (AdNDP) analysis. The occupation numbers (ONs) are shown.

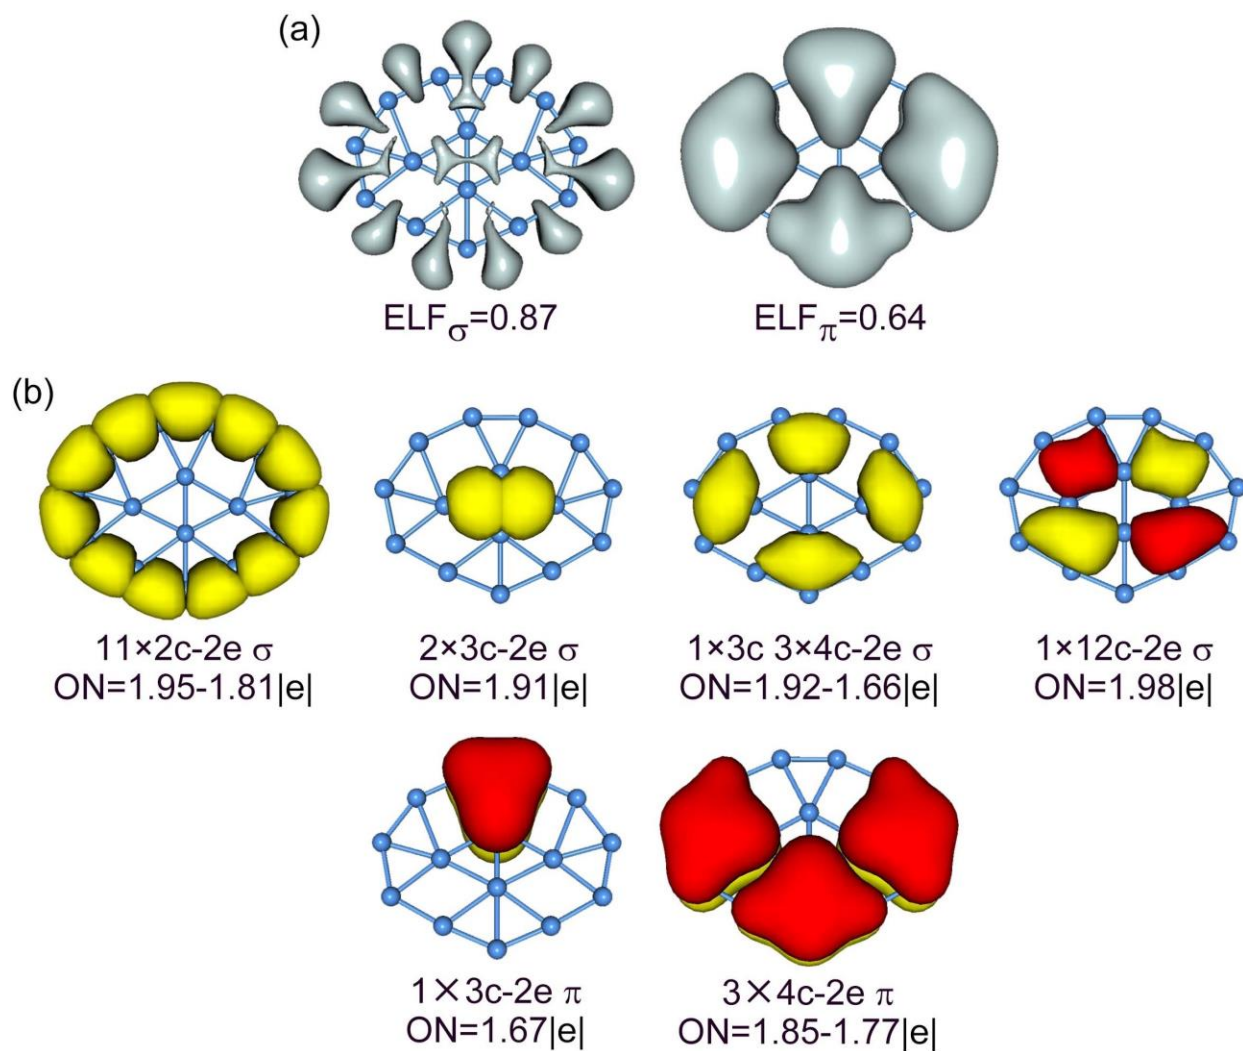

**Figure S4.** Optimized structure of the  $C_{2v}$  global minimum of  $B_{14}^-$  cluster at the PBE0/6-311+G\* level.

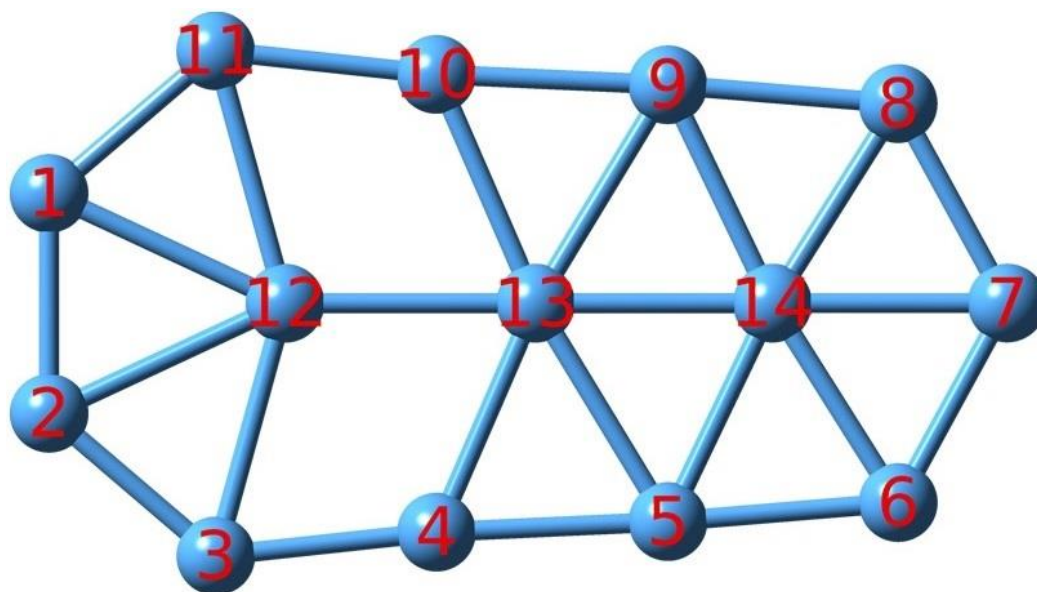

GM,  $C_{2v}$

**Figure S5.** Evolution of electron localization function,  $\text{ELF}_\sigma$ , against the bifurcation value for the  $C_{2v}$  global minimum of  $\text{B}_{15}^+$  cluster. Note that for the rhombic B1B2B12B11 unit, the  $\text{ELF}_\sigma$  data is consistent with one four-center island only, rather than two three-center islands (B1B2B12 and B11B1B12), supporting the AdNDP scheme presented in Fig. 5(b).

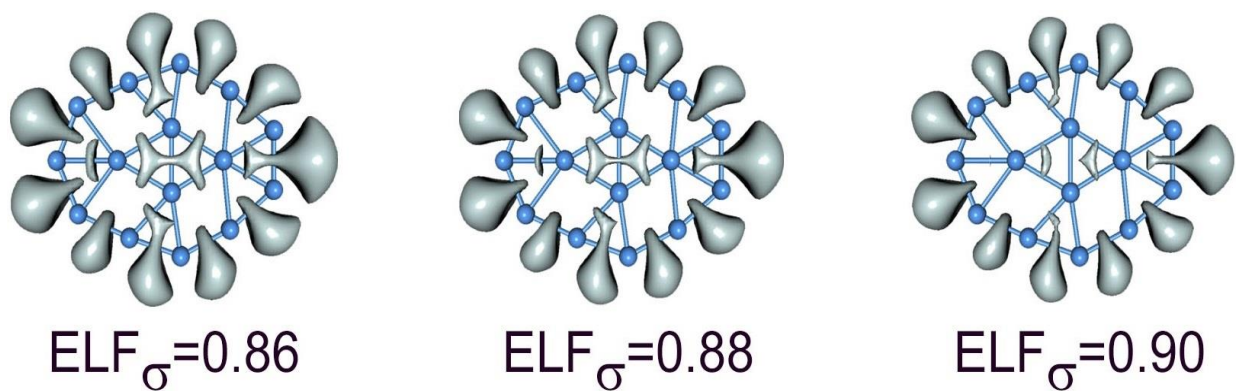

**Table S1.** Cartesian coordinates for the global-minimum structure of  $\text{B}_{15}^+ \text{C}_{2v} (^1\text{A}_1)$  and its corresponding  $\text{C}_{2v}$  transition state at the PBE0/6-311+G\* level.

**(a) GM of  $\text{B}_{15}^+ \text{C}_{2v}$**

|   |            |             |             |
|---|------------|-------------|-------------|
| B | 0.00000000 | 0.00000000  | 3.22413600  |
| B | 0.00000000 | 1.38650300  | 2.60984100  |
| B | 0.00000000 | 2.00601300  | 1.12463900  |
| B | 0.00000000 | 2.47696800  | -0.35955800 |
| B | 0.00000000 | 1.78165400  | -1.78525600 |
| B | 0.00000000 | 0.76156000  | -3.03970000 |
| B | 0.00000000 | -0.76156000 | -3.03970000 |
| B | 0.00000000 | -1.78165400 | -1.78525600 |
| B | 0.00000000 | -2.47696800 | -0.35955800 |
| B | 0.00000000 | -2.00601300 | 1.12463900  |
| B | 0.00000000 | -1.38650300 | 2.60984100  |
| B | 0.00000000 | 0.00000000  | 1.46918600  |
| B | 0.00000000 | 0.82890700  | -0.10000900 |
| B | 0.00000000 | 0.00000000  | -1.59323600 |
| B | 0.00000000 | -0.82890700 | -0.10000900 |

**(b) TS of  $\text{B}_{15}^+ \text{C}_{2v}$**

|   |            |            |             |
|---|------------|------------|-------------|
| B | 0.00000000 | 3.14286300 | -0.38330400 |
| B | 0.00000000 | 2.85508000 | 1.10302000  |
| B | 0.00000000 | 1.44316400 | 1.89486400  |
| B | 0.00000000 | 0.00000000 | 2.51837900  |

|   |            |             |             |
|---|------------|-------------|-------------|
| B | 0.00000000 | -1.44316400 | 1.89486400  |
| B | 0.00000000 | -2.85508000 | 1.10302000  |
| B | 0.00000000 | -3.14286300 | -0.38330400 |
| B | 0.00000000 | -2.21793000 | -1.64214700 |
| B | 0.00000000 | -0.76617000 | -2.32396200 |
| B | 0.00000000 | 0.76617000  | -2.32396200 |
| B | 0.00000000 | 2.21793000  | -1.64214700 |
| B | 0.00000000 | 1.52931900  | 0.06796100  |
| B | 0.00000000 | 0.00000000  | 0.85279500  |
| B | 0.00000000 | -1.52931900 | 0.06796100  |
| B | 0.00000000 | 0.00000000  | -0.80403700 |
